# Supplementary material
Source: Springer Nature journal article supplement (https://www.springermedizin.de/resource/supplementary/12986_2009_255_MOESM3_ESM.pdf/25655692)

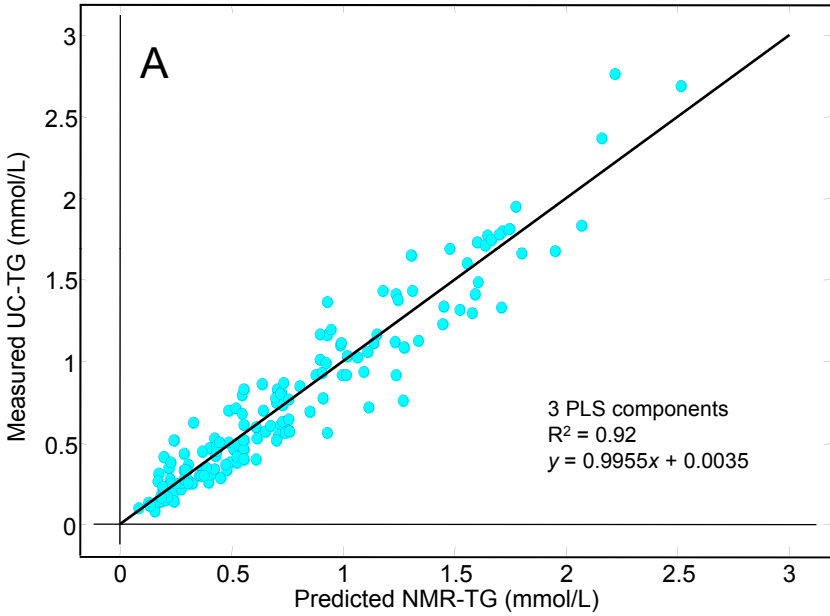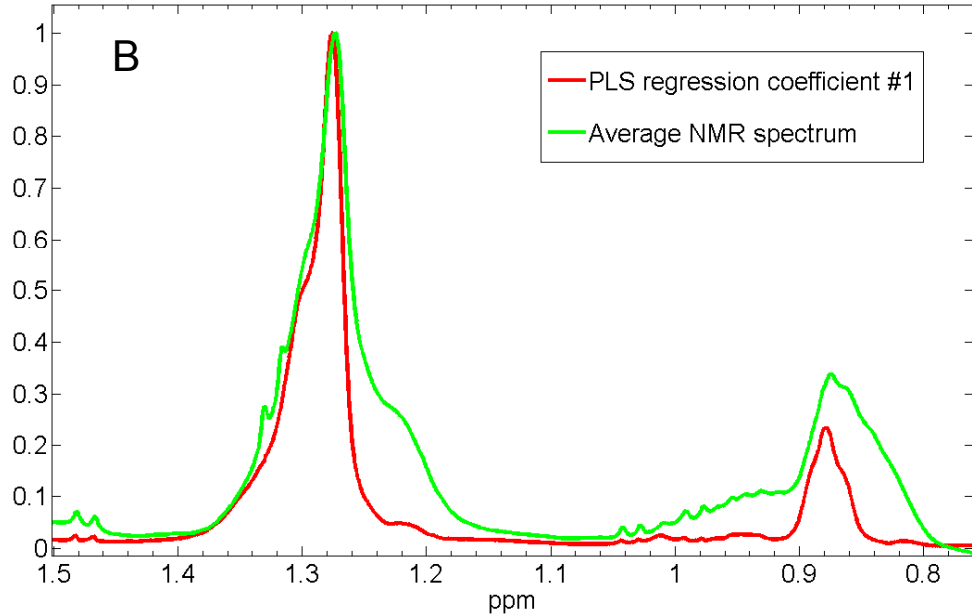

Supplement: MOESM3 [file 25655692]
